# Supplementary material
Source: PubMed Central journal article supplement (PMC7473634)
Supplement: NIHMS1621588-supplement-Supplemental_Tables_S1-S4.pdf [file NIHMS1621588-supplement-Supplemental_Tables_S1-S4.pdf]

### Online Supplemental Material

#### Supplementary Psychometric Results of Appeal and Sensory Effect Ratings

**Table S1.** Bivariate Correlations Among Appeal and Sensory Effect Ratings Pooled Across All Conditions

**Table S2.** Standardized Estimates, 95% Confidence Intervals, and P-Values of Total, Direct, and Indirect Effects and Component Paths from Multiple Mediator Model

**Table S3.** Correlational Paths Among Sensory Effect Ratings in the Multiple Mediator Model

**Table S4.** Standardized Indirect Effect Estimates From Multiple Mediator Model Stratified by Smoking Status

### **Supplementary Psychometric Results of Appeal and Sensory Effect Ratings**

An exploratory factor analysis was conducted using the 7 items as separate indicators (i.e., “Liking,” “Willingness to use again,” and “Disliking,” “Sweetness,” “Bitterness,” “Harshness,” and “Smoothness”). The solution yielded only one prominent factor (eigenvalue = 3.91, 55.78% of variance) with large standardized factor loadings for “liking” (0.95), “willingness to use again” (.89), and “disliking” (-.78), indicative of the appeal construct. “Sweetness,” “Bitterness,” “Harshness,” and “Smoothness” each had substantially lower loadings on this factor (range: -.08 to .43). Consequently, the three appeal items were combined in a composite score and the remaining for sensory effect ratings were analyzed separately as four unique outcomes.

**Table S1. Bivariate Correlations Among Appeal and Sensory Effect Ratings Pooled Across All Conditions**

|            | <b>Appeal</b> | <b>Sweetness</b> | <b>Smoothness</b> | <b>Bitterness</b> |
|------------|---------------|------------------|-------------------|-------------------|
| Appeal     | -             | -                | -                 | -                 |
| Sweetness  | .43*          | -                | -                 | -                 |
| Smoothness | .55*          | .31*             | -                 | -                 |
| Bitterness | -.48*         | -.33*            | -.43*             | -                 |
| Harshness  | -.33*         | -.17*            | -.64*             | .48*              |

*Note.* Values reflect Pearson Correlation Coefficients. \* $p < .05$  (two-tailed).

**Table S2. Standardized Estimates, 95% Confidence Intervals, and P-Values of Total, Direct, and Indirect Effects and Component Paths from Multiple Mediator Model in Figure 2**

|                                     | Flavor and Nicotine Content → Appeal and Sensory Effects |        |                                |        |                                       |        | Sensory Effects → Appeal       |        |
|-------------------------------------|----------------------------------------------------------|--------|--------------------------------|--------|---------------------------------------|--------|--------------------------------|--------|
|                                     | Fruit vs. Tobacco                                        |        | Menthol vs. Tobacco            |        | Nicotine-Containing vs. Nicotine-Free |        |                                |        |
|                                     | β (95%CI)                                                | P      | β (95%CI)                      | P      | β (95%CI)                             | P      | β (95%CI)                      | P      |
| <b>Flavor and Nicotine → Appeal</b> |                                                          |        |                                |        |                                       |        |                                |        |
| Total effects <sup>a</sup>          | .22 (.17, .28)                                           | <.001* | .12 (.05, .20)                 | .001*  | -.20 (-.24, -.16)                     | <.001* | NA                             | NA     |
| Indirect effects <sup>b</sup>       |                                                          |        |                                |        |                                       |        |                                |        |
| Sweetness (mediator)                | .092 (.062, .122)                                        | <.001* | .003 (-.012, .017)             | .71    | -.036 (-.049, -.023)                  | <.001* | NA                             | NA     |
| Smoothness (mediator)               | .045 (.026, .063)                                        | <.001* | .039 (.017, .061)              | .001*  | -.156 (-.190, -.123)                  | <.001* | NA                             | NA     |
| Bitterness (mediator)               | .072 (.050, .094)                                        | <.001* | .034 (.018, .051)              | <.001* | -.067 (-.082, -.050)                  | <.001* | NA                             | NA     |
| Harshness (mediator)                | .002 (-.003, .008)                                       | .40    | -.001 (-.004, .002)            | .65    | .022 (-.032, .076)                    | .43    | NA                             | NA     |
| Direct effects <sup>c</sup>         | .02 (-.02, .07)                                          | .37    | .05 (-.01, .10)                | .11    | .03 (-.02, .07)                       | .07    | NA                             | NA     |
| <b>Component paths</b>              |                                                          |        |                                |        |                                       |        |                                |        |
| Sweetness                           | .40 (.35, .45) <sup>d</sup>                              | <.001  | .01 (-.05, .08) <sup>d</sup>   | .71    | -.16 (-.19, -.13) <sup>d</sup>        | <.001* | .23 (.16, .30) <sup>e</sup>    | <.001* |
| Smooth                              | .10 (.07, .14) <sup>d</sup>                              | <.001* | .09 (.04, .14) <sup>d</sup>    | <.001* | -.36 (-.42, -.31) <sup>d</sup>        | <.001* | .43 (.36, .51) <sup>e</sup>    | <.001* |
| Bitter                              | -.27 (-.32, -.22) <sup>d</sup>                           | <.001* | -.13 (-.19, -.07) <sup>d</sup> | <.001* | .25 (.21, .29) <sup>d</sup>           | <.001* | -.27 (-.33, -.21) <sup>e</sup> | <.001* |
| Harsh                               | -.05 (-.08, -.01) <sup>d</sup>                           | .01*   | .01 (-.03, .06) <sup>d</sup>   | .56    | .43 (.38, .49) <sup>d</sup>           | <.001* | .05 (-.07, .17) <sup>e</sup>   | .42    |

<sup>a</sup>Univariable effect of respective product characteristic on appeal.

<sup>b</sup>Indirect effect estimates from multiple mediator model depicted in Figure 1 indicating mediation by the respective sensory effect after adjusting for the mediating effects of the three other sensory effects.

<sup>c</sup>Effect of respective product characteristic on appeal adjusted for effects of four mediator variables.

<sup>d</sup>Univariable effect of respective product characteristic on respective sensory effect outcome.

<sup>e</sup>Association of respective sensory effect with appeal adjusted for three other sensory effect variables.

\*Statistically significant after Benjamini-Hochberg correction for multiple tests to control study-wise false discovery rate at .05.

NA=Not Applicable

CI=Confidence Interval

**Table S3. Correlational Paths Among Sensory Effect Ratings in the Multiple Mediator Model**

| <b>Correlational Paths</b> | <b>Estimate (95% CI)</b> | <b>P</b> |
|----------------------------|--------------------------|----------|
| Sweetness ↔ Smoothness     | .24 (.18, .30)           | <.001    |
| Sweetness ↔ Bitterness     | -.22 (-.29, -.15)        | <.001    |
| Sweetness ↔ Harshness      | -.08 (-.13, -.02)        | .004     |
| Smoothness ↔ Bitterness    | -.33 (-.39, -.26)        | <.001    |
| Smoothness ↔ Harshness     | -.49 (-.55, -.42)        | <.001    |
| Bitterness ↔ Harshness     | .36 (.30, .42)           | <.001    |

**Table S4. Standardized Indirect Effect Estimates From Multiple Mediator Model Stratified by Smoking Status**

|                        | Fruit vs. Tobacco     | Menthol vs. Tobacco    | Nicotine vs. Nicotine-Free |
|------------------------|-----------------------|------------------------|----------------------------|
|                        | $\beta$ (95%CI)       | $\beta$ (95%CI)        | $\beta$ (95%CI)            |
| Never Smokers (N=22)   |                       |                        |                            |
| Sweetness (mediator)   | 0.099 (0.028, 0.170)  | 0.019 (-0.021, 0.059)  | -0.038 (-0.064, -0.012)    |
| Smoothness (mediator)  | 0.044 (0.014, 0.075)  | 0.068 (0.030, 0.105)   | -0.197 (-0.274, -0.120)    |
| Bitterness (mediator)  | 0.067 (0.021, 0.113)  | 0.035 (0.004, 0.067)   | -0.064 (-0.093, -0.034)    |
| Harshness (mediator)   | 0.001 (-0.003, 0.005) | 0.002 (-0.002, 0.006)  | -0.032 (-0.068, 0.004)     |
| Former Smokers (N=25)  |                       |                        |                            |
| Sweetness (mediator)   | 0.095 (0.035, 0.155)  | 0.001 (-0.030, 0.029)  | -0.032 (-0.050, -0.015)    |
| Smoothness (mediator)  | 0.027 (0.001, 0.052)  | 0.020 (-0.015, 0.055)  | -0.096 (-0.141, -0.051)    |
| Bitterness (mediator)  | 0.094 (0.049, 0.139)  | 0.021 (-0.022, 0.063)  | -0.081 (-0.118, -0.044)    |
| Harshness (mediator)   | 0.003 (-0.002, 0.007) | -0.001 (-0.003, 0.002) | -0.008 (-0.026, 0.010)     |
| Current Smokers (N=53) |                       |                        |                            |
| Sweetness (mediator)   | 0.091 (0.053, 0.128)  | -0.002 (-0.020, 0.016) | -0.038 (-0.057, -0.020)    |
| Smoothness (mediator)  | 0.053 (0.023, 0.083)  | 0.035 (0.004, 0.067)   | -0.169 (-0.212, -0.126)    |
| Bitterness (mediator)  | 0.059 (0.032, 0.087)  | 0.025 (0.007, 0.044)   | -0.056 (-0.077, -0.035)    |
| Harshness (mediator)   | 0.001 (-0.001, 0.004) | -0.002 (-0.006, 0.003) | -0.025 (-0.045, -0.006)    |

Indirect effect estimates from multiple mediator model depicted in Figure 2 indicating mediation by the respective sensory perception measure after adjusting for the mediating effects of the three other sensory perception measures, by smoking status.
